# Supplementary material for: Laminar flow ventilation system to prevent airborne infection during exercise in the COVID-19 crisis: A single-center observational study
Source: PubMed Central journal article supplement (PMC8580245; doi:10.1371/journal.pone.0257549), 2021-11-10

S1 Fig

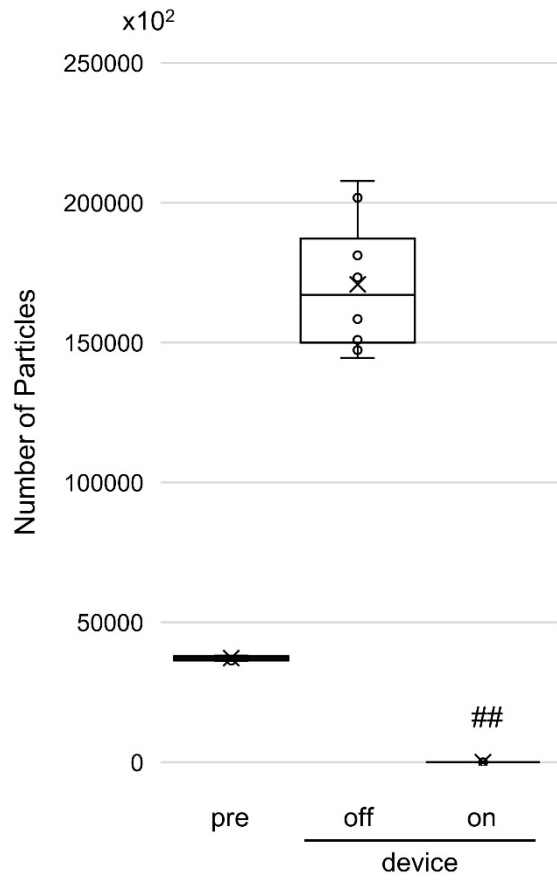

Supplement: pone.0257549.s001.pdf [file pone.0257549.s001.pdf]
